# Supplementary material
Source: PubMed Central journal article supplement (PMC3269546)
Supplement: NIHMS339791-supplement-01.pdf [file NIHMS339791-supplement-01.pdf]

| SNP        | Minor/Major Alleles | Clinical stage T3 or higher, or evidence of metastasis at the time of diagnosis |        |        |        | WHO III or Gleason score 8 or higher at the time of diagnosis |        |        |       | Clinical stage T3 or higher, evidence of metastasis, WHO III, or Gleason score 8 or higher at the time of diagnosis |        |        |        |
|------------|---------------------|---------------------------------------------------------------------------------|--------|--------|--------|---------------------------------------------------------------|--------|--------|-------|---------------------------------------------------------------------------------------------------------------------|--------|--------|--------|
|            |                     | OR                                                                              | 95% LI | 95% UI | P      | OR                                                            | 95% LI | 95% UI | P     | OR                                                                                                                  | 95% LI | 95% UI | P      |
| rs1465618  | A/G                 | 1.08                                                                            | 0.84   | 1.38   | 0.55   | 1.08                                                          | 0.80   | 1.44   | 0.62  | 1.16                                                                                                                | 0.93   | 1.43   | 0.18   |
| rs721048   | A/G                 | 0.99                                                                            | 0.76   | 1.30   | 0.96   | 0.99                                                          | 0.71   | 1.38   | 0.95  | 0.94                                                                                                                | 0.74   | 1.20   | 0.63   |
| rs12621278 | G/A                 | 0.71                                                                            | 0.45   | 1.13   | 0.14   | 1.12                                                          | 0.69   | 1.82   | 0.65  | 0.74                                                                                                                | 0.49   | 1.10   | 0.13   |
| rs2660753  | T/C                 | 1.07                                                                            | 0.75   | 1.53   | 0.72   | 0.85                                                          | 0.54   | 1.34   | 0.49  | 1.09                                                                                                                | 0.80   | 1.50   | 0.59   |
| rs10934853 | A/C                 | 1.10                                                                            | 0.86   | 1.41   | 0.44   | 1.16                                                          | 0.86   | 1.55   | 0.33  | 1.09                                                                                                                | 0.88   | 1.36   | 0.41   |
| rs12500426 | A/C                 | 0.98                                                                            | 0.79   | 1.21   | 0.86   | 1.19                                                          | 0.92   | 1.53   | 0.20  | 1.06                                                                                                                | 0.88   | 1.28   | 0.55   |
| rs17021918 | T/C                 | 0.94                                                                            | 0.75   | 1.18   | 0.58   | 1.08                                                          | 0.82   | 1.41   | 0.58  | 0.91                                                                                                                | 0.75   | 1.11   | 0.35   |
| rs7679673  | A/C                 | 0.87                                                                            | 0.70   | 1.07   | 0.19   | 0.83                                                          | 0.64   | 1.08   | 0.16  | 0.87                                                                                                                | 0.72   | 1.05   | 0.15   |
| rs2736098  | A/G                 | 1.11                                                                            | 0.87   | 1.40   | 0.41   | 0.97                                                          | 0.73   | 1.30   | 0.86  | 1.03                                                                                                                | 0.83   | 1.27   | 0.82   |
| rs401681   | A/G                 | 0.95                                                                            | 0.77   | 1.17   | 0.62   | 1.01                                                          | 0.78   | 1.30   | 0.95  | 0.99                                                                                                                | 0.82   | 1.19   | 0.92   |
| rs2347867  | G/A                 | 0.83                                                                            | 0.66   | 1.04   | 0.10   | 1.19                                                          | 0.91   | 1.55   | 0.20  | 1.00                                                                                                                | 0.83   | 1.22   | 0.97   |
| rs9364554  | T/C                 | 1.19                                                                            | 0.95   | 1.49   | 0.13   | 0.91                                                          | 0.69   | 1.19   | 0.48  | 1.14                                                                                                                | 0.93   | 1.39   | 0.20   |
| rs10486567 | T/C                 | 0.80                                                                            | 0.61   | 1.04   | 0.091  | 0.66                                                          | 0.47   | 0.92   | 0.013 | 0.75                                                                                                                | 0.59   | 0.96   | 0.021  |
| rs6465657  | C/T                 | 1.04                                                                            | 0.84   | 1.29   | 0.72   | 1.11                                                          | 0.86   | 1.42   | 0.44  | 1.04                                                                                                                | 0.86   | 1.25   | 0.71   |
| rs2928679  | A/G                 | 1.09                                                                            | 0.88   | 1.36   | 0.42   | 1.14                                                          | 0.88   | 1.47   | 0.32  | 1.09                                                                                                                | 0.90   | 1.32   | 0.37   |
| rs12543663 | C/A                 | 1.06                                                                            | 0.84   | 1.33   | 0.64   | 1.04                                                          | 0.79   | 1.37   | 0.80  | 1.02                                                                                                                | 0.83   | 1.25   | 0.88   |
| rs10086908 | C/T                 | 1.11                                                                            | 0.89   | 1.38   | 0.37   | 0.87                                                          | 0.66   | 1.14   | 0.29  | 1.01                                                                                                                | 0.83   | 1.23   | 0.90   |
| rs1016343  | T/C                 | 1.30                                                                            | 1.02   | 1.66   | 0.035  | 1.34                                                          | 1.01   | 1.79   | 0.043 | 1.28                                                                                                                | 1.03   | 1.58   | 0.024  |
| rs13252298 | G/A                 | 0.97                                                                            | 0.74   | 1.26   | 0.80   | 0.90                                                          | 0.66   | 1.23   | 0.50  | 0.96                                                                                                                | 0.76   | 1.22   | 0.74   |
| rs16902094 | G/A                 | 0.87                                                                            | 0.63   | 1.20   | 0.38   | 0.89                                                          | 0.61   | 1.30   | 0.55  | 0.89                                                                                                                | 0.68   | 1.19   | 0.44   |
| rs445114   | C/T                 | 0.87                                                                            | 0.69   | 1.08   | 0.21   | 0.83                                                          | 0.63   | 1.08   | 0.16  | 0.89                                                                                                                | 0.73   | 1.08   | 0.25   |
| rs620861   | A/G                 | 0.84                                                                            | 0.67   | 1.05   | 0.12   | 0.84                                                          | 0.64   | 1.09   | 0.19  | 0.87                                                                                                                | 0.71   | 1.06   | 0.15   |
| rs6983267  | T/G                 | 0.95                                                                            | 0.77   | 1.17   | 0.63   | 0.79                                                          | 0.62   | 1.01   | 0.064 | 0.93                                                                                                                | 0.77   | 1.13   | 0.48   |
| rs4242382  | A/G                 | 1.02                                                                            | 0.73   | 1.42   | 0.93   | 1.01                                                          | 0.68   | 1.52   | 0.94  | 0.99                                                                                                                | 0.74   | 1.33   | 0.94   |
| rs10763588 | G/T                 | 1.28                                                                            | 1.04   | 1.59   | 0.020  | 1.25                                                          | 0.97   | 1.62   | 0.081 | 1.18                                                                                                                | 0.98   | 1.42   | 0.077  |
| rs7098889  | C/T                 | 1.29                                                                            | 1.04   | 1.59   | 0.018  | 1.22                                                          | 0.95   | 1.57   | 0.12  | 1.17                                                                                                                | 0.97   | 1.41   | 0.092  |
| rs10993994 | T/C                 | 1.30                                                                            | 1.05   | 1.62   | 0.015  | 1.27                                                          | 0.98   | 1.64   | 0.072 | 1.19                                                                                                                | 0.99   | 1.44   | 0.065  |
| rs17178655 | A/G                 | 0.97                                                                            | 0.75   | 1.25   | 0.81   | 0.88                                                          | 0.65   | 1.20   | 0.41  | 0.90                                                                                                                | 0.72   | 1.13   | 0.35   |
| rs7127900  | A/G                 | 1.24                                                                            | 0.96   | 1.61   | 0.10   | 1.15                                                          | 0.85   | 1.56   | 0.35  | 1.17                                                                                                                | 0.93   | 1.48   | 0.17   |
| rs11228565 | A/G                 | 1.46                                                                            | 1.14   | 1.88   | 0.0029 | 1.29                                                          | 0.95   | 1.75   | 0.10  | 1.38                                                                                                                | 1.10   | 1.74   | 0.0049 |
| rs7931342  | G/T                 | 1.08                                                                            | 0.88   | 1.34   | 0.47   | 1.00                                                          | 0.78   | 1.30   | 0.97  | 1.08                                                                                                                | 0.89   | 1.30   | 0.44   |
| rs10896449 | G/A                 | 1.10                                                                            | 0.89   | 1.36   | 0.38   | 0.97                                                          | 0.76   | 1.26   | 0.85  | 1.08                                                                                                                | 0.89   | 1.31   | 0.43   |
| rs11649743 | T/C                 | 0.76                                                                            | 0.59   | 1.00   | 0.044  | 0.73                                                          | 0.52   | 1.01   | 0.061 | 0.76                                                                                                                | 0.60   | 0.96   | 0.022  |
| rs4430796  | C/T                 | 1.09                                                                            | 0.88   | 1.35   | 0.44   | 0.80                                                          | 0.62   | 1.04   | 0.10  | 0.94                                                                                                                | 0.77   | 1.13   | 0.50   |
| rs7501939  | A/G                 | 1.12                                                                            | 0.90   | 1.40   | 0.33   | 0.87                                                          | 0.66   | 1.15   | 0.34  | 0.97                                                                                                                | 0.79   | 1.18   | 0.73   |
| rs1859962  | T/G                 | 0.86                                                                            | 0.70   | 1.06   | 0.17   | 0.83                                                          | 0.65   | 1.07   | 0.15  | 0.89                                                                                                                | 0.74   | 1.07   | 0.23   |
| rs8102476  | A/G                 | 0.95                                                                            | 0.77   | 1.18   | 0.67   | 0.83                                                          | 0.64   | 1.07   | 0.15  | 0.91                                                                                                                | 0.76   | 1.11   | 0.35   |

|            |     |      |      |      |       |      |      |      |      |      |      |      |       |
|------------|-----|------|------|------|-------|------|------|------|------|------|------|------|-------|
| rs925013   | G/A | 1.10 | 0.86 | 1.41 | 0.45  | 0.89 | 0.65 | 1.21 | 0.46 | 1.00 | 0.80 | 1.24 | 0.97  |
| rs266882   | G/A | 1.08 | 0.87 | 1.35 | 0.48  | 1.02 | 0.79 | 1.33 | 0.86 | 1.07 | 0.88 | 1.30 | 0.49  |
| rs2271094  | C/T | 1.19 | 0.97 | 1.48 | 0.10  | 1.00 | 0.77 | 1.29 | 0.98 | 1.14 | 0.95 | 1.38 | 0.17  |
| rs61752561 | A/G | 1.20 | 0.71 | 2.02 | 0.50  | 1.20 | 0.67 | 2.13 | 0.55 | 1.14 | 0.73 | 1.79 | 0.57  |
| rs17632542 | C/T | 0.57 | 0.35 | 0.92 | 0.021 | 1.07 | 0.65 | 1.75 | 0.80 | 0.74 | 0.50 | 1.10 | 0.13  |
| rs2735839  | A/G | 0.82 | 0.60 | 1.12 | 0.21  | 0.94 | 0.65 | 1.36 | 0.75 | 0.83 | 0.62 | 1.09 | 0.18  |
| rs198977   | T/C | 1.25 | 0.98 | 1.59 | 0.073 | 1.00 | 0.74 | 1.35 | 0.99 | 1.05 | 0.84 | 1.30 | 0.67  |
| rs198978   | T/G | 1.10 | 0.89 | 1.37 | 0.38  | 0.97 | 0.75 | 1.26 | 0.82 | 0.98 | 0.80 | 1.18 | 0.80  |
| rs80050017 | T/G | 1.23 | 0.83 | 1.82 | 0.30  | 1.28 | 0.82 | 2.02 | 0.28 | 1.18 | 0.84 | 1.67 | 0.34  |
| rs1654553  | G/A | 0.89 | 0.72 | 1.10 | 0.29  | 0.98 | 0.76 | 1.27 | 0.90 | 0.98 | 0.81 | 1.18 | 0.81  |
| rs7291691  | G/T | 1.16 | 0.88 | 1.51 | 0.29  | 1.06 | 0.77 | 1.45 | 0.73 | 1.11 | 0.88 | 1.41 | 0.38  |
| rs5759167  | T/G | 0.86 | 0.69 | 1.06 | 0.15  | 0.84 | 0.65 | 1.09 | 0.19 | 0.85 | 0.70 | 1.02 | 0.087 |
| rs5945619  | G/A | 1.20 | 0.88 | 1.64 | 0.26  | 1.22 | 0.85 | 1.75 | 0.29 | 1.30 | 0.99 | 1.71 | 0.059 |
